# Supplementary material for: Exploration of solid-state nanopores in characterizing reaction mixtures generated from a catalytic DNA assembly circuit
Source: PubMed Central journal article supplement (PMC6385554; doi:10.1039/c8sc04875d), 2018-12-13
Supplement: SC-010-C8SC04875D-s001.pdf [file SC-010-C8SC04875D-s001.pdf]

## Supporting Information for

### Exploration of solid-state nanopore in characterizing reaction mixtures generated from catalytic DNA assembly circuit

Zhentong Zhu <sup>†,‡</sup>, Ruiping Wu <sup>†,§</sup> and Bingling Li <sup>†,\*</sup>

<sup>†</sup>State Key Lab of Electroanalytical Chemistry, Changchun Institute of Applied Chemistry, Chinese Academy of Science, Changchun, Jilin, 130022, P.R. China.

<sup>‡</sup>University of Chinese Academy of Sciences, Beijing, 100049, China.

<sup>§</sup>University of Science and Technology of China, Hefei, Anhui 230026, China

\* Email: binglingli@ciac.ac.cn. Phone: +86-431-85262008

#### Contents

|                                                           |           |
|-----------------------------------------------------------|-----------|
| CGN set-up and reproducibility.....                       | Figure S1 |
| Stability of CGN data .....                               | Figure S2 |
| Performance of ECD fitting.....                           | Figure S3 |
| Distinguish mixed DNA marker samples .....                | Figure S4 |
| Characterization super long SP-CHA products .....         | Figure S5 |
| Oligonucleotides used in this paper .....                 | Table S1  |
| Number of events in each scatter plot and histogram ..... | Table S2  |
| Summary of experimental results in Figure 5 .....         | Table S3  |

## 1. Supporting Figures and Tables

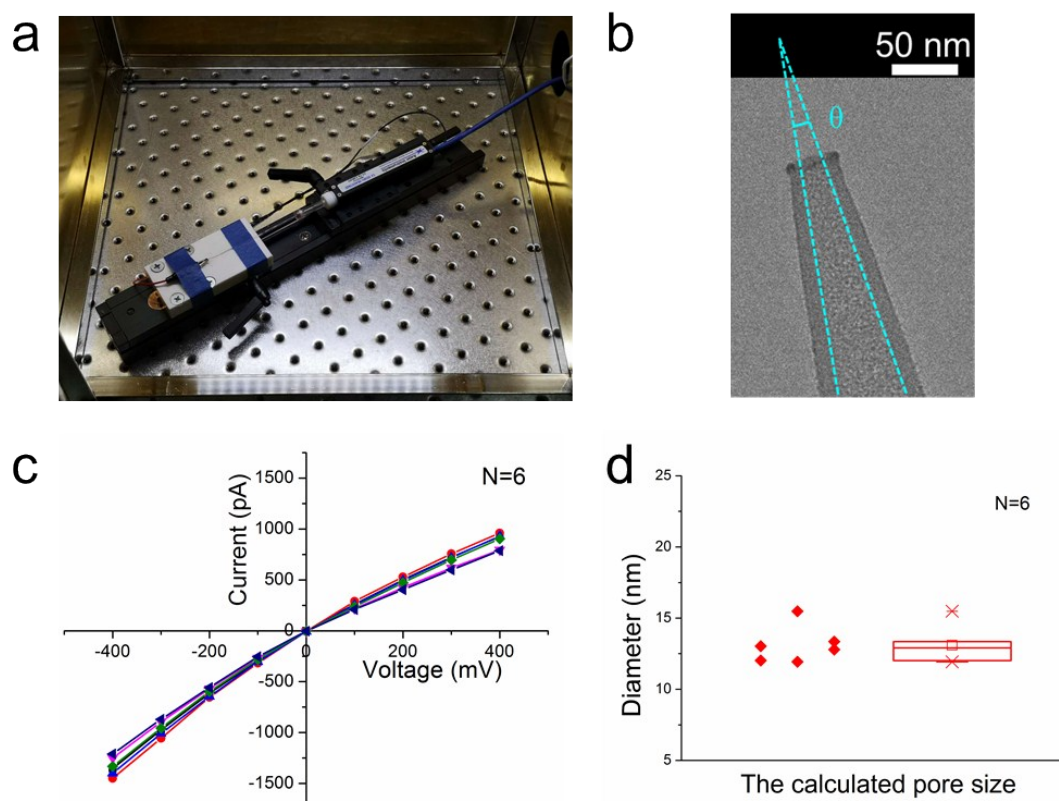

**Figure S1. CGN set-up and reproducibility.** (a) The photograph of conical glass nanopore measurement set-up. The photo was taken by one of the author of this paper. (b) TEM image of a conical glass nanopore. (c)  $I$ - $V$  characteristics of conical glass nanopores in 0.1 M KCl (N=6) and corresponding calculated nanopore diameters (d). Note: Figure S1b and S1c were, in respective, identical to the Figure 1c and 1d, here to show the reproducibility of nanopore combined with the calculation method as described below.

We could use the electrochemical measurement and estimate the nanopore diameter according to the classical equation (1).<sup>1</sup> We chose the current data between -100mV and 100mV because in this interval the linear and rectification ratio is close to 0. The calculated pore size (13.1 nm  $\pm$  1.3 nm) is in good agreement with TEM image (15 nm  $\pm$  5 nm) according to the measurements using six randomly selected pores.

$$(1): \quad a = \frac{1}{\pi \kappa R \tan \theta / 2}$$

Where  $R$  is the measured pipette resistance,  $\kappa$  is the specific resistance of the electrolyte used ( $\kappa = 1.2$  S/m in 0.1 M KCl),  $\theta$  is the cone angle ( $\theta = 12^\circ$  in Figure S1b) and  $a$  is the radius of the nanopore at the tip of the nanopipette.

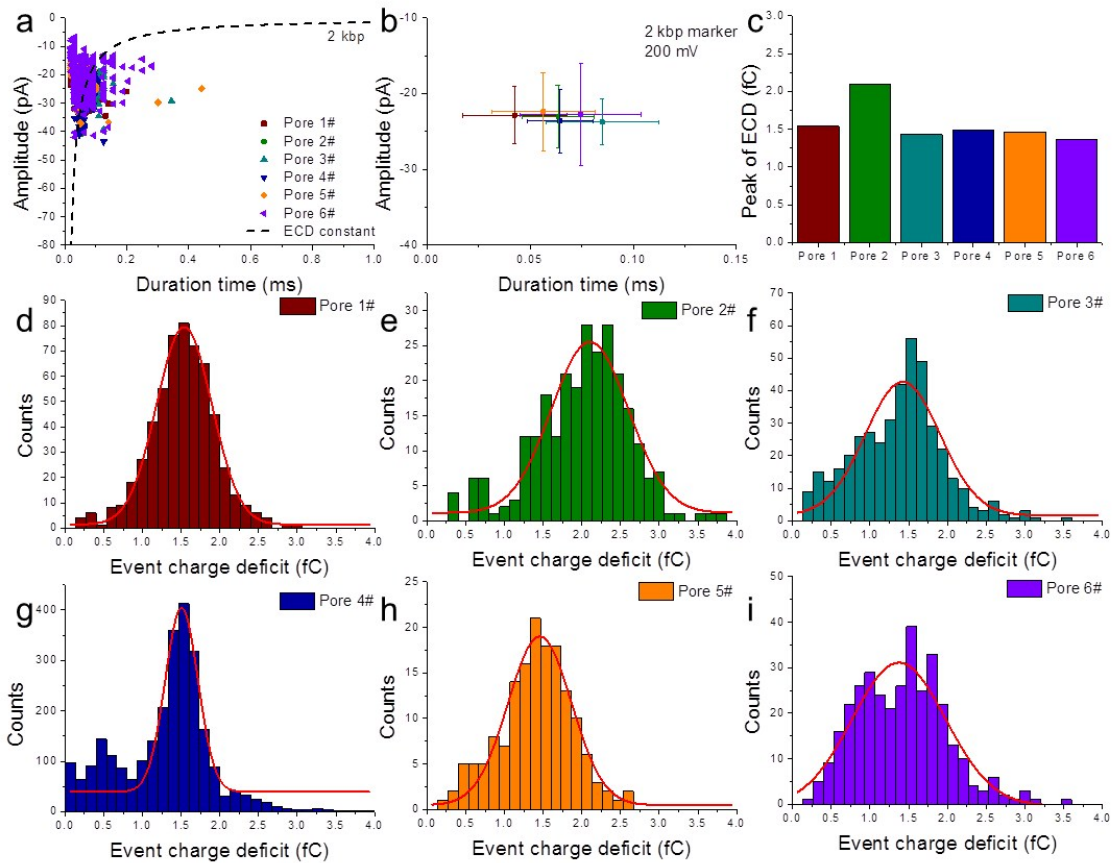

**Figure S2. Stability of CGN data.** Scatter plots (a) and corresponding XY error bar graph (b) of 2 kbp DNA marker at 200 mV (the measurements is used by six randomly selected pores). (c) The histogram of 2 kbp DNA marker ECD calculated in six pores, peak value of which are determined by the ECD peak location from the individual Gaussian fits (d-i). Note: Dash line in (a) was fitted by constant ECD (mean value is 1.56 fC for six randomly selected pores).

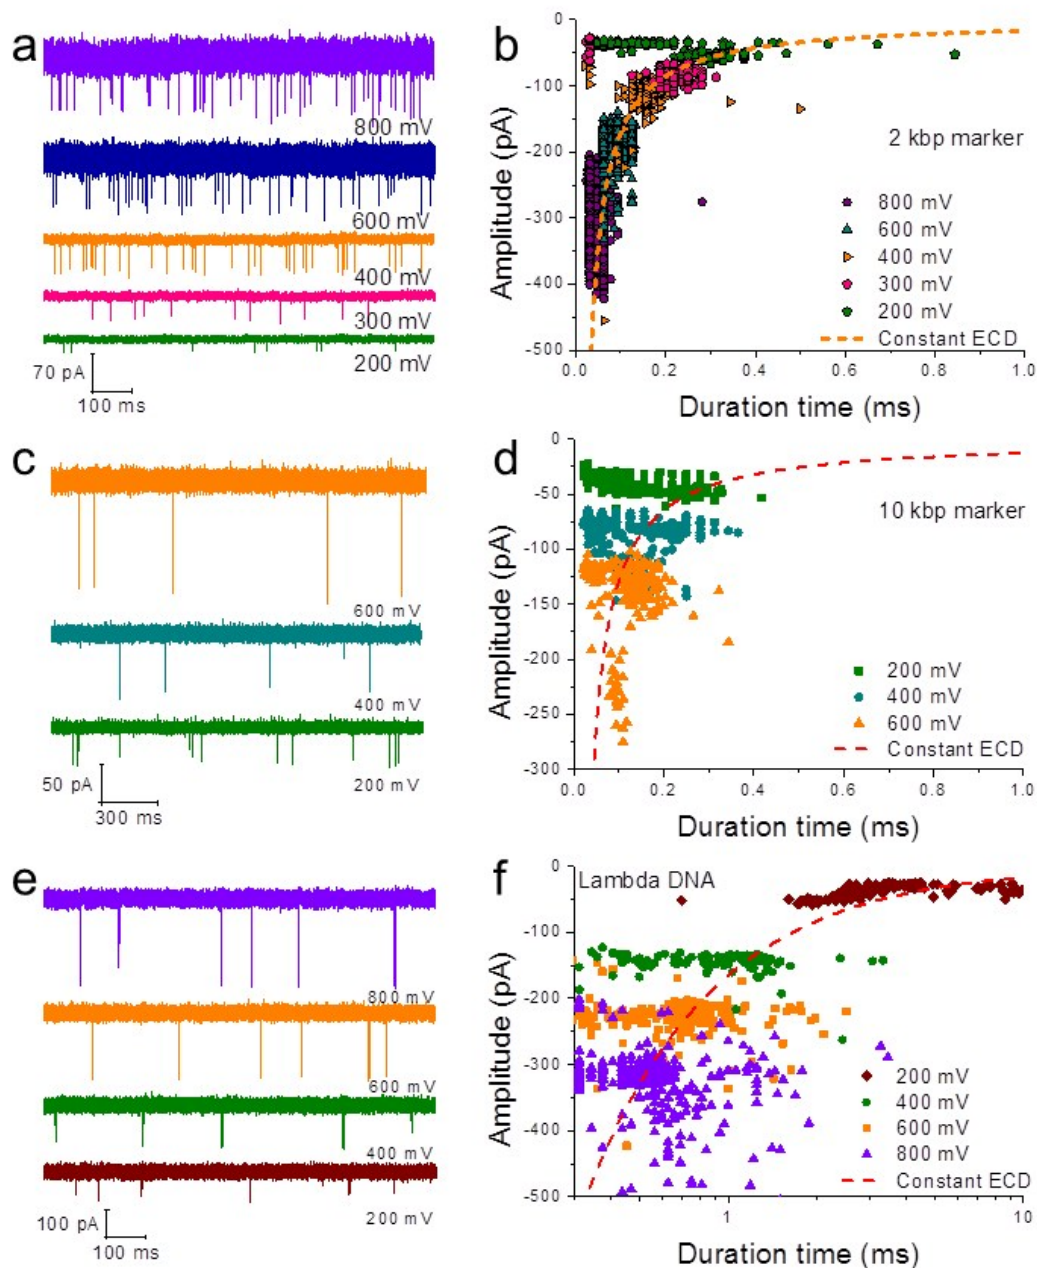

**Figure S3. Performance of ECD fitting.** Current traces recorded from 2 kbp DNA marker (a), 10 kbp DNA marker (c) and Lambda DNA (e). Scatter plots of 2 kbp DNA marker (b), 10 kbp DNA marker (d) and Lambda DNA (f). Dash lines were fitted by calculated constant ECD. Note: Figure S3b was identical to the Figure 2d, here to systematically show the voltage-independent ECD fitting strategy was perfectly matched with our experiment results. Translocation measurements in presence of different voltages were performed with the same pore in this figure.

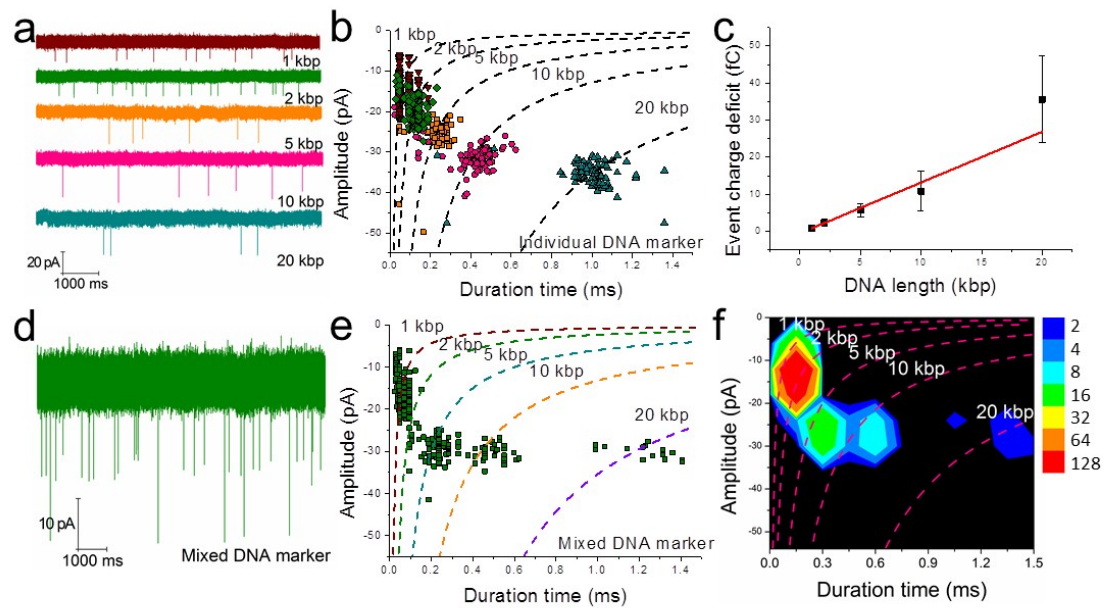

**Figure S4. Distinguish of mixed DNA marker samples.** Current trace of individual DNA marker (a) and mixed DNA marker (d) at 200 mV. (b) Scatter plot of individual DNA marker (length range 1 to 20 kbp) at 200 mV. (c) Calculated ECD values of DNA markers from figure S4b. (e) Scatter plot of mixed DNA marker (length range 1 to 20 kbp) at 200 mV. (d) Event density plot of mixed DNA marker. Note: All experiments as shown in this figure were performed with the same pore. Figure S4a, S4b, S4d, and S4e were, in respective, identical to the Figure 2b, 2e, 2c, and 2f here to systematically confirm the sensitivity of CGN used in this paper.

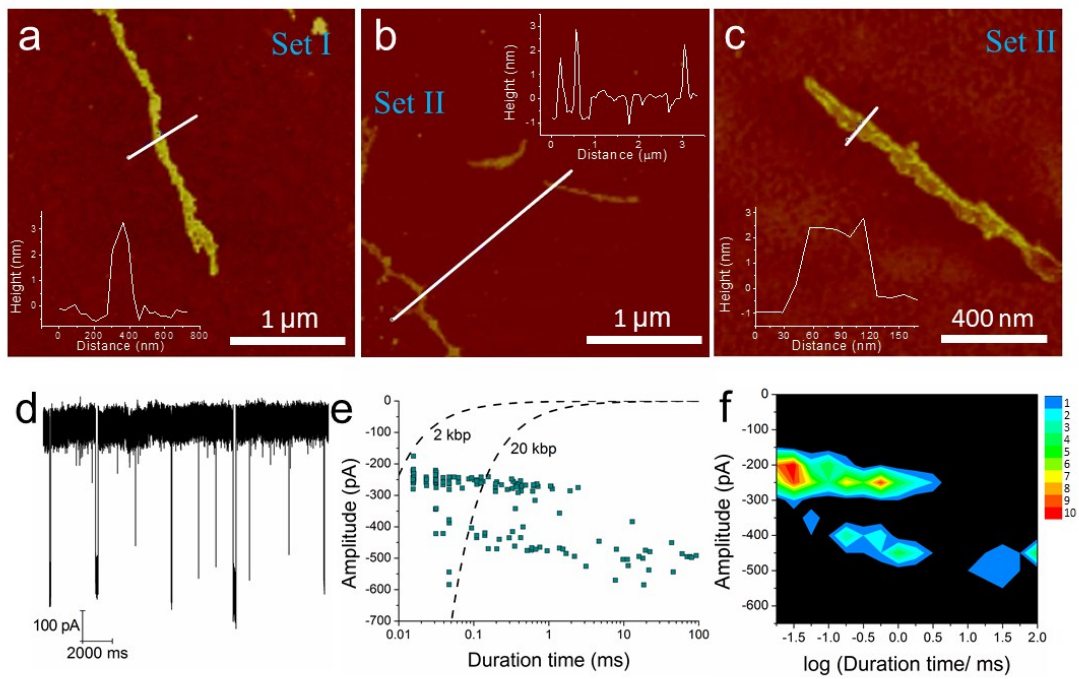

**Figure S5. Characterization of Super long SP-CHA products.** (a-c) AFM images of super long SP-CHA products. (d) Current traces recorded of SP-CHA (Set I) at 700 mV. (e) Scatter plot of SP-CHA (Set I) at 700 mV and corresponding event density plot (f).



| Name                                       | Sequence 5'-3'                                                                                                                           | Label and notes                                           |
|--------------------------------------------|------------------------------------------------------------------------------------------------------------------------------------------|-----------------------------------------------------------|
| Sequences of four sets of SP-CHA reactions |                                                                                                                                          |                                                           |
| C1                                         | [3*2*1*}<br>[CGACATCT AACCTAGC TCACTGAC}                                                                                                 | C1 is identical for all of four sets of SP-CHA            |
| SET-1-H1                                   | [TG 1 2 3 T 5* 4* 3* 2* 6}<br>TG GTCAGTGA GCTAGGTT AGATGTCG T GAGAGAAC CCGATA<br>TG CGACATCT  <u>AACCTAGC GAGACAAG</u> }                 | The sticky ends for seed elongation cycle are underlined. |
| SET-1-H2                                   | [3 4 5 1* 6* 5* 4* AA}<br>[AGATGTCG CATATCGG GTTCTCTC TCACTGAC CTTGCTC GAGAGAAC CCGATATG AA}                                             |                                                           |
| SET-1-H3                                   | [5 6 1 T 3* 2* 1* 6* 2'}<br>[GTTCTCTC GAGACAAG GTCAGTGA T CGACATCT AACCTAGC TCACTGAC CTTGCTC GCTAGGTT}                                   |                                                           |
| SET-2-H1                                   | [TG 1 2 3 T 5* 4* 3* 2* 6 CCTTGTCATAGAGCAC}<br>TG GTCAGTGA GCTAGGTT AGATGTCG T GAGAGAAC CCGATA<br>TG CGACATCT AACCTAGC/CCTTGTCATAGAGCAC} | The sticky ends for seed elongation cycle are underlined. |
| SET-2-H2                                   | [3 4 5 1* 6* 5* 4* AA 6'}<br>[AGATGTCG CATATCGG GTTCTCTC TCACTGAC CTTGCTC GAGAGAAC CCGATATG AA GAGA}                                     |                                                           |
| SET-2-H3                                   | [5 6 1 T 3* 2* 1* 6* TT 4}<br>[GTTCTCTC GAGACAAG GTCAGTGA T CGACATCT AACCTAGC TCACTGAC CTTGCTC TT CATATCGG}                              |                                                           |
| SET-3-H1                                   | [TG 1 2 3 T 5* 4* 3* 2* 6}<br>TG GTCAGTGA GCTAGGTT AGATGTCG T GAGAGAAC CCGATA<br>TG CGACATCT AACCTAGC/ <u>GAGACAAG</u> }                 | The sticky ends for seed elongation cycle are underlined. |
| SET-3-H2                                   | [3 4 5 1* 6* 5* 4* AA}<br>[AGATGTCG CATATCGG GTTCTCTC TCACTGAC CTTGCTC GAGAGAAC CCGATATG AA}                                             |                                                           |
| SET-3-H3                                   | [5 6 1 T 3* 2* 1* 6* 2'}<br>[GTTCTCTC GAGACAAG GTCAGTGA T CGACATCT AACCTAGC TCACTGAC CTTGCTC GCTAGG}                                     |                                                           |
| SET-4-H1                                   | [TG 1 2 3 T 5* 4* 3* 2* 6}<br>TG GTCAGTGA GCTAGGTT AGATGTCG T GAGAGAAC CCGATA<br>TG CGACATCT AACCTAGC/ <u>GAGACAAG</u> }                 | The sticky ends for seed elongation cycle are underlined. |
| SET-4-H2                                   | [3 4 5 (1* 6* 5* 4* 7 8}<br>[AGATGTCG CATATCGG GTTCTCTC TCACTGAC CTTGCTC GAGAGAAC CCGATATG GAGAAACA CATCATTC}                            |                                                           |
| SET-4-H3                                   | [5 6 1 T 3* 2* 1* 6* 2'}<br>[GTTCTCTC GAGACAAG GTCAGTGA T CGACATCT AACCTAGC TCACTGAC CTTGCTC GCTAGG}                                     |                                                           |

| Sequences for real-time fluorescence kinetic reading of three-way CHA cycle (Seed production) |                                                                                                                     |          |
|-----------------------------------------------------------------------------------------------|---------------------------------------------------------------------------------------------------------------------|----------|
| C1                                                                                            | [3* 2* 1*}<br>[CGACATCT AACCTAGC TCACTGAC}                                                                          |          |
| SET-1-H1                                                                                      | [TG 1 2 3 T 5* 4* 3* 2* 6}<br>TG GTCAGTGA GCTAGGTT AGATGTCG T GAGAGAAC CCGATA<br>TG CGACATCT AACCTAGC GAGACAAG}     |          |
| SET-4-H2                                                                                      | [3 4 5 1* 6* 5* 4* 7 8}<br>[AGATGTCG CATATCGG GTTCTCTC TCACTGAC CTTGCTCTC GA<br>GAGAAC CCGATATG GAGAAACA CATCATTTC} |          |
| SET-1-H3                                                                                      | [5 6 1 T 3* 2* 1* 6* 2'}<br>[GTTCTCTC GAGACAAG GTCAGTGA T CGACATCT AACCTAGC <br>TCACTGAC CTTGCTCTC GCTAGGTTT}       |          |
| F                                                                                             | [CA 8* 7* 4}<br>[CA GAATCATG TGTTTCTC CATATCGG}                                                                     | 5' 6-FAM |
| Q                                                                                             | [A 7 8 TG}<br>[A GAGAAACA CATGATTTC TG}                                                                             | 3' BHQ1  |
| Sequences for HCR reaction                                                                    |                                                                                                                     |          |
| HCR-I                                                                                         | AGTCTAGGATTCGGCGTGGGTAA                                                                                             |          |
| HCR-H1                                                                                        | TTAACCCACGCCGAATCCTAGACTCAAAGTAGTCTAGGATTCG<br>GCGTG                                                                |          |
| HCR-H2                                                                                        | AGTCTAGGATTCGGCGTGGGTAAACACGCCGAATCCTAGACTA<br>CTTTG                                                                |          |

**Table S1:** Oligonucleotides used in this paper. All labeled sequences were purified with high-pressure liquid chromatography. All unlabeled sequences were polyacrylamide gel electrophoresis purified.



|               | Number of events |
|---------------|------------------|
| Figure 2d     | 3806             |
| Figure 2e     | 1282             |
| Figure 2f     | 925              |
| Figure 2h, i  | 453              |
| Figure 3f, i  | 1109             |
| Figure 3g, j  | 392              |
| Figure 4b     | 1071             |
| Figure 4c     | 1291             |
| Figure 4e     | 1367             |
| Figure 4f     | 332              |
| Figure 4h     | 1097             |
| Figure 4i     | 97               |
| Figure 5c     | 2454             |
| Figure 5e     | 323              |
| Figure 5f     | 841              |
| Figure 5g     | 564              |
| Figure 5h     | 726              |
| Figure S2a    | 4465             |
| Figure S3d    | 2104             |
| Figure S3f    | 2671             |
| Figure S5e, f | 371              |
| Figure S6d, e | 461              |

**Table S2:** Number of events in each scatter plot and histogram.

| C1 Conc.        | 10 nM | 20 nM | 30 nM | 40 nM |
|-----------------|-------|-------|-------|-------|
| Event Freq.(Hz) | 8     | 13    | 16    | 183   |
| Amplitude (pA)  | -18.1 | -20.3 | -33.8 | -42.3 |
| $\tau$ (ms)     | 0.02  | 0.04  | 0.03  | 0.09  |

**Table S3:** Summary of experimental results of Figure 5. Event frequency was calculated by average number of translocation events per second. The peaks in the amplitude histogram were fitted into a Gaussian to determine the mean value. The duration time histogram was fitted with an exponential function.

**Reference:**

(1). Fu, Y.; Tokuhisa, H.; Baker, L. A. *Chem. Commun.* **2009**, 4877.
